# Supplementary material for: Profiling of Intracellular Metabolites: An Approach to Understanding the Characteristic Physiology of Mycobacterium leprae
Source: PLoS Negl Trop Dis. 2016 Aug 1;10(8):e0004881. doi: 10.1371/journal.pntd.0004881 (PMC4968842; doi:10.1371/journal.pntd.0004881)
Supplement: S5 Table — Metabolites are arranged in descending order of their mean ratio (M. leprae/M. bovis BCG). (XLSX) [file pntd.0004881.s006.xlsx]

## Sheet: Sheet1
S5 Table. Comparative analyses of the relative peak areas of 84 compounds detected commonly in M. leprae (n=3) and M. bovis BCG (n=3). Metabolites are arranged in descending order of their mean ratio (M. leprae/M. bovis BCG).
Compound name	Relative peak area										Comparative analysis
	M. leprae					M. bovis BCG					M. leprae/M. bovis BCG
	M. leprae-1	M. leprae-2	M. leprae-3	Mean	S.D.	M bovis BCG-1	M bovis BCG-2	M bovis BCG-3	Mean	S.D.	Ratio	p-value
Thr	0.594997	0.624207	0.471241	0.563482	0.0812067	0.00121061	0.00153014	0.00116902	0.00130325	0.000197584	432.366	0.00688328
Phe	0.678341	0.631007	0.526176	0.611842	0.077872	0.00187637	0.00242343	0.00203042	0.00211007	0.000282097	289.962	0.00539262
His	0.372141	0.335272	0.271939	0.326451	0.0506801	0.00109309	0.00106555	0.00122201	0.00112688	8.35242e-05	289.694	0.00799252
Ile	1.09119	1.06385	0.866331	1.00712	0.122694	0.00432137	0.00474113	0.00437033	0.00447761	0.00022952	224.924	0.0049543
Leu	1.92482	1.82372	1.54972	1.76609	0.194076	0.00798767	0.00900857	0.00766825	0.00822149	0.000700087	214.813	0.00403806
Gly	0.527424	0.577475	0.410826	0.505242	0.0855106	0.00291021	0.00329185	0.00237227	0.00285811	0.000462001	176.775	0.00951784
Arg	1.05499	1.09781	0.856921	1.00324	0.128511	0.00588452	0.00616983	0.00635011	0.00613482	0.000234761	163.532	0.00549133
Pro	0.61943	0.702203	0.582666	0.634766	0.0612262	0.00345166	0.00450285	0.00400036	0.00398495	0.000525765	159.291	0.00312394
Trp	0.150464	0.14584	0.125925	0.140743	0.0130396	0.000778905	0.00115454	0.000841242	0.000924896	0.000201305	152.172	0.00288109
Tyr	0.49087	0.475445	0.382815	0.44971	0.0584437	0.00346574	0.00351242	0.00313004	0.0033694	0.000208603	133.469	0.00566605
Met	0.237461	0.200767	0.150583	0.19627	0.0436134	0.00140193	0.00205166	0.00160886	0.00168749	0.000331925	116.309	0.0163323
GABA	0.370884	0.357196	0.315559	0.34788	0.0288151	0.00312533	0.00453826	0.0036285	0.00376403	0.000716145	92.4221	0.00231688
Asp	0.351883	0.439129	0.212431	0.334481	0.114347	0.00398971	0.00369855	0.00399801	0.00389542	0.000170549	85.8651	0.0376427
Val	1.21127	1.1732	0.97177	1.11875	0.1287	0.0145613	0.0187913	0.0155105	0.0162877	0.00221954	68.6866	0.00450228
Lys	1.27846	1.41167	1.01238	1.23417	0.203297	0.0219439	0.0241712	0.0230432	0.0230527	0.00111369	53.5369	0.00926031
Guanosine	0.0179164	0.00518609	0.00433793	0.00914681	0.00760652	8.64e-05	0.000264114	0.000229302	0.000193272	9.41762e-05	47.3261	0.178309
Ala	0.978691	0.994642	0.78069	0.918008	0.119188	0.0230462	0.0253343	0.0229719	0.0237841	0.00134301	38.5975	0.00586466
Ser	0.482286	0.481634	0.334471	0.432797	0.0851536	0.0125965	0.0137243	0.0121483	0.0128231	0.000812068	33.7515	0.0134222
2'-Deoxycytidine	0.00293398	0.00666241	0.00489152	0.0048293	0.00186499	0.0001462	0.000230142	0.0001342	0.000170181	5.22738e-05	28.3775	0.0493772
N6-Methyllysine	0.0367023	0.0373118	0.0319703	0.0353281	0.00292391	0.00151896	0.00183683	0.00186021	0.00173867	0.000190628	20.3191	0.00242852
Urea	0.799009	0.667246	0.318547	0.594934	0.24826	0.0626184	0.0302252	0.0242666	0.0390367	0.0206385	15.2404	0.059568
Ala-Ala	0.0267392	0.0294268	0.0300201	0.0287287	0.00174832	0.00254747	0.00280908	0.00275725	0.0027046	0.000138525	10.6222	0.00141527
Gln	0.467508	0.440788	0.326023	0.41144	0.0751699	0.0513242	0.068449	0.0553926	0.0583886	0.00894685	7.04658	0.0137988
Argininosuccinic acid	0.000815178	0.00120744	0.000488964	0.000837193	0.000359741	8.2e-05	0.000179	0.0001478	0.000136267	4.95178e-05	6.14378	0.0750774
Gluconic acid	0.0072514	0.00863192	0.00415372	0.00667901	0.00229331	0.00110563	0.00125509	0.00110973	0.00115682	8.51353e-05	5.77361	0.0527793
Citrulline	0.00850768	0.00683923	0.0051569	0.0068346	0.00167539	0.00122517	0.00115263	0.00124358	0.00120713	4.80861e-05	5.66188	0.028212
Glu	0.0615329	0.0626273	0.0455564	0.0565722	0.00955566	0.0108197	0.0108071	0.0102829	0.0106366	0.000306328	5.31864	0.0140477
Inosine	0.0100206	0.0016062	0.00166518	0.00443065	0.00484111	0.000586121	0.00121339	0.000844525	0.000881346	0.000315252	5.02715	0.331756
GMP	0.0132388	0.0192414	0.00965835	0.0140462	0.00484228	0.0020813	0.00383173	0.00309698	0.00300333	0.000878964	4.67687	0.0543582
CMP	0.0159176	0.0219648	0.0141382	0.0173402	0.00410263	0.00291526	0.00502554	0.00403322	0.00399134	0.00105577	4.34446	0.0241791
3-Indoxylsulfuric acid	0.00294448	0.00211566	0.000917438	0.00199253	0.00101912	0.000393795	0.000622379	0.000461711	0.000492628	0.000117387	4.04468	0.123721
Succinic acid	0.015486	0.0151185	0.0163755	0.01566	0.000646322	0.00381321	0.00429095	0.0042553	0.00411982	0.000266128	3.80114	0.000218869
Citramalic acid	0.00512413	0.00670427	0.00249034	0.00477291	0.00212881	0.0012284	0.00172465	0.00104898	0.00133401	0.000349996	3.57787	0.10383
Lactic acid	0.119028	0.13558	0.0848569	0.113155	0.0258663	0.0402598	0.040366	0.0298864	0.0368374	0.00602001	3.07174	0.0307848
XMP	0.000840559	0.00117719	0.000693339	0.000903695	0.000248025	0.000246203	0.000324848	0.000337508	0.000302853	4.94669e-05	2.98394	0.0475953
Malic acid	0.0197841	0.0259075	0.00710594	0.0175992	0.0095893	0.00707067	0.00727807	0.00575114	0.00669996	0.000828219	2.62675	0.186992
N-Acetylaspartic acid	0.000935216	0.00104379	0.000378233	0.000785746	0.000357067	0.000312162	0.000342567	0.000284857	0.000313195	2.88688e-05	2.5088	0.148074
Adenosine	0.00553606	0.00690107	0.00495492	0.00579735	0.000999039	0.00223571	0.00387032	0.00299452	0.00303352	0.000818	1.9111	0.0221443
IMP	0.00108982	0.00132073	0.000626004	0.00101218	0.000353809	0.000512651	0.000615734	0.000552839	0.000560408	5.19567e-05	1.80616	0.154865
Homoserine	0.00145485	0.00160426	0.00102824	0.00136245	0.000298922	0.000867771	0.00105167	0.000839836	0.000919759	0.000115089	1.48131	0.110428
N-Acetylglutamic acid	0.000936478	0.00056558	0.000441885	0.000647981	0.000257387	0.000521794	0.000593586	0.000485337	0.000533572	5.50771e-05	1.21442	0.52431
Pyridoxamine 5'-phosphate	0.000571231	0.000840904	0.000341805	0.000584647	0.00024982	0.000469091	0.000688992	0.000463762	0.000540615	0.000128526	1.08145	0.803703
2-Aminoadipic acid	0.00169769	0.00178056	0.00116975	0.00154933	0.000331328	0.00158452	0.00158947	0.00169139	0.00162179	6.03272e-05	0.955321	0.743205
Thymidine	0.00227775	0.00435477	0.00331837	0.00331696	0.00103851	0.00348614	0.00398611	0.00351831	0.00366352	0.000279833	0.905405	0.626596
N5-Ethylglutamine	0.0066605	0.00468737	0.0045469	0.00529826	0.00118183	0.00705045	0.00576744	0.00731093	0.00670961	0.000826273	0.789652	0.173649
Nicotinamide	0.0105326	0.0105524	0.00778519	0.00962342	0.00159199	0.0106847	0.014231	0.0121319	0.0123492	0.00178313	0.779274	0.120374
myo-Inositol 1-phosphate myo-Inositol 3-phosphate	0.00149559	0.00259777	0.000690709	0.00159469	0.000957384	0.00130677	0.00309565	0.00203585	0.00214609	0.000899522	0.743066	0.507629
Shikimate 3-phosphate	0.00223266	0.00428047	0.00187328	0.00279547	0.00129854	0.00342856	0.00406798	0.00392522	0.00380725	0.000335637	0.734247	0.308161
Diethanolamine	0.00633888	0.00828425	0.00259797	0.00574036	0.00289	0.00767591	0.0102937	0.00608611	0.00801858	0.00212464	0.715883	0.338107
S-Adenosylhomocysteine	0.00116012	0.0013286	0.0011406	0.00120978	0.000103369	0.00133152	0.00203588	0.00179549	0.00172096	0.000358044	0.702965	0.1227
Ophthalmic acid	0.000518248	0.000485882	0.000570302	0.000524811	4.25905e-05	0.000695382	0.000988512	0.000831864	0.000838586	0.000146681	0.625828	0.0561
Pantothenic acid	0.000473288	0.00049225	0.000397697	0.000454411	5.00229e-05	0.000826773	0.000877828	0.000826895	0.000843832	2.94412e-05	0.538509	0.000950107
dAMP	0.00051052	0.000602245	0.000333518	0.000482094	0.0001366	0.000703345	0.000995216	0.000991599	0.00089672	0.000167478	0.53762	0.0310944
dCMP	0.000397562	0.000570261	0.00035456	0.000440794	0.000114164	0.000625631	0.00103951	0.000915323	0.000860155	0.000212385	0.512459	0.0555195
AMP	0.0144977	0.0205434	0.0130919	0.0160444	0.0039592	0.0273037	0.0372202	0.0359892	0.0335044	0.00540506	0.478874	0.0130681
UMP	0.0138894	0.0189777	0.0123297	0.0150656	0.00347661	0.0254745	0.0377532	0.0324123	0.03188	0.00615663	0.472572	0.0234788
Myristoleic acid	0.000236644	0.000344029	0.000692287	0.00042432	0.000238197	0.000892732	0.00170176	0.000714843	0.00110311	0.000526019	0.384657	0.141494
Decanoic acid	0.00242891	0.00248309	0.00282491	0.00257897	0.000214706	0.00669843	0.00699973	0.00672722	0.00680846	0.000166273	0.378789	1.90076e-05
5'-Deoxy-5'-methylthioadenosine	0.000547499	0.000464072	0.000461695	0.000491089	4.88673e-05	0.00129461	0.00130334	0.00136643	0.00132146	3.91884e-05	0.371625	3.09605e-05
S-Adenosylmethionine	0.0012832	0.00125166	0.00119937	0.00124475	4.23401e-05	0.00374156	0.00314879	0.00324305	0.0033778	0.000318533	0.368508	0.00659139
Citric acid	0.0144921	0.0163386	0.005825	0.0122186	0.00561344	0.0306768	0.035858	0.0348761	0.0338036	0.00275208	0.361457	0.0102109
Quinic acid	0.000561635	0.00063735	0.000402957	0.000533981	0.000119618	0.00192065	0.00145296	0.00115968	0.00151109	0.000383801	0.353374	0.0379671
Glycerol 3-phosphate	0.00669481	0.00797897	0.00369237	0.00612205	0.00219995	0.0160973	0.0202144	0.0177003	0.018004	0.00207531	0.340039	0.00246685
Glucose 1-phosphate	0.00370174	0.00449031	0.00191799	0.00337002	0.00131785	0.00839442	0.0135041	0.0111162	0.0110049	0.00255664	0.306229	0.019443
2-Furoic acid	0.0040911	0.00150795	0.00243247	0.00267718	0.00130884	0.00932307	0.00965463	0.00909922	0.00935897	0.000279437	0.286054	0.00998287
Lauric acid	0.0143848	0.0146411	0.0173324	0.0154528	0.00163287	0.0551939	0.0553681	0.052712	0.0544247	0.00148576	0.283929	7.40094e-06
Ribulose 5-phosphate	0.0019449	0.00250493	0.000808545	0.00175279	0.000864356	0.00580243	0.00732089	0.00643561	0.00651964	0.00076271	0.268848	0.0021321
FAD_divalent	0.000416493	0.000486009	0.000336675	0.000413059	7.47262e-05	0.00133485	0.00175049	0.00161734	0.00156756	0.000212242	0.263504	0.00602687
NAD+	0.00231027	0.00194794	0.00176912	0.00200911	0.000275715	0.00822005	0.00920796	0.00945833	0.00896212	0.000654724	0.224178	0.00082529
Benzoic acid	0.000535816	0.00119128	0.000129571	0.000618888	0.000535705	0.00285975	0.0043441	0.00371664	0.00364016	0.000745128	0.170016	0.00623554
GDP-glucose	0.000626633	0.000790252	0.000635473	0.000684119	9.20196e-05	0.00400848	0.00475976	0.00453004	0.00443276	0.000384973	0.154333	0.00228271
NADP+	0.0003963	0.000413458	0.000268288	0.000359349	7.93264e-05	0.00242807	0.00246072	0.00277972	0.00255617	0.000194284	0.140581	0.000747456
2-Isopropylmalic acid	0.00164767	0.00204779	0.00148768	0.00172771	0.000288506	0.0185906	0.0189069	0.0172311	0.0182429	0.000890347	0.0947062	0.000347294
dTMP	0.00221309	0.00238246	0.00217997	0.00225851	0.000108615	0.0191568	0.029618	0.0236519	0.0241423	0.0052478	0.0935499	0.018599
Sedoheptulose 7-phosphate	0.00617672	0.00950408	0.00387755	0.00651945	0.00282888	0.0733607	0.0917909	0.0832464	0.0827994	0.00922323	0.0787379	0.00258774
Trehalose 6-phosphate	0.00204713	0.00336462	0.00135827	0.00225667	0.00101945	0.0282278	0.0328621	0.0339108	0.0316669	0.00302413	0.0712628	0.00155019
Fructose 6-phosphate	0.00593692	0.0103801	0.00390017	0.00673908	0.00331363	0.0858701	0.117044	0.101457	0.101457	0.015587	0.0664229	0.00688833
N-Acetylglucosamine 1-phosphate	0.00104313	0.00153994	0.000813806	0.00113229	0.000371187	0.013359	0.0207725	0.018889	0.0176735	0.00385335	0.0640671	0.0168899
Glucose 6-phosphate	0.014352	0.0304493	0.0101292	0.0183101	0.0107227	0.251549	0.341949	0.313819	0.302439	0.0462618	0.0605416	0.00642446
6-Phosphogluconic acid	0.00198465	0.00214374	0.00123412	0.00178751	0.000485801	0.0289566	0.0374395	0.0343489	0.0335817	0.00429314	0.0532286	0.0055355
Ribose 5-phosphate	0.000367271	0.000659973	0.000147821	0.000391689	0.000256948	0.00631051	0.00903963	0.00712413	0.00749142	0.00140114	0.0522849	0.0107491
UDP-N-acetylglucosamine	0.0014451	0.00184106	0.00111208	0.00146608	0.000364943	0.0312306	0.0365764	0.0355295	0.0344455	0.00283297	0.0425623	0.00213345
UDP-glucose UDP-galactose	0.00106143	0.000720042	0.000418213	0.000733227	0.000321809	0.0191705	0.0202934	0.0206933	0.0200524	0.000789463	0.0365655	9.78373e-05
ADP	0.000626633	0.000895567	0.000571821	0.000698007	0.000173273	0.0339617	0.0428984	0.0436412	0.0401671	0.00538685	0.0173776	0.00611011
